# Supplementary material for: Study of the Metal–Support Interaction and Electronic Effect Induced by Calcination Temperature Regulation and Their Effect on the Catalytic Performance of Glycerol Steam Reforming for Hydrogen Production
Source: Nanomaterials (Basel). 2021 Nov 22;11(11):3149. doi: 10.3390/nano11113149 (PMC8620743; doi:10.3390/nano11113149)
Supplement: Supplementary file 1 [file nanomaterials-11-03149-s001.zip › nanomaterials-1441401-supplementary.pdf]

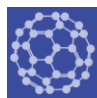

## Supplementary Materials

# Study of the Metal–Support Interaction and Electronic Effect Induced by Calcination Temperature Regulation and their Effect on the Catalytic Performance of Glycerol Steam Reforming for Hydrogen Production

Songshan Zhu <sup>1,4,5</sup>, Yunzhu Wang <sup>1,4,5</sup>, Jichang Lu <sup>1,4,5</sup>, Huihui Lu <sup>1,4,5</sup>, Sufang He<sup>1,3,\*</sup>, Di Song<sup>1,4,5</sup>, Yongming Luo <sup>1,2,4,5</sup> and Jiangping Liu <sup>1,4,5,\*</sup>

<sup>1</sup> Faculty of environmental science and engineering, Kunming University of Science and Technology, Kunming 650500, China; Zhuss525@163.com (S.Z.); wyzkust@163.com (Y.W.); lujichangc7@kust.edu.cn (J.L.); luhuihuihuihuihui@163.com (H.L.); songdi0512@163.com (D.S.); environcatalysis@kust.edu.cn (Y.L.)

<sup>2</sup> Faculty of chemical engineering, Kunming University of Science and Technology, Kunming 650500, China.

<sup>3</sup> Research Center for Analysis and Measurement, Kunming University of Science and Technology, Kunming 650093, China.

<sup>4</sup> The Innovation Team for Volatile Organic Compounds Pollutants Control and Resource Utilization of Yunnan Province, Kunming 650500, China.

<sup>5</sup> The Higher Educational Key Laboratory for Odorous Volatile Organic Compounds Pollutants Control of Yunnan Province, Kunming 650500, China.

\* Correspondence: shuca1983@163.com (S.H.); liujiangping@gig.ac.cn (J.L.); Tel: +86-871-65103845 (J.L.).

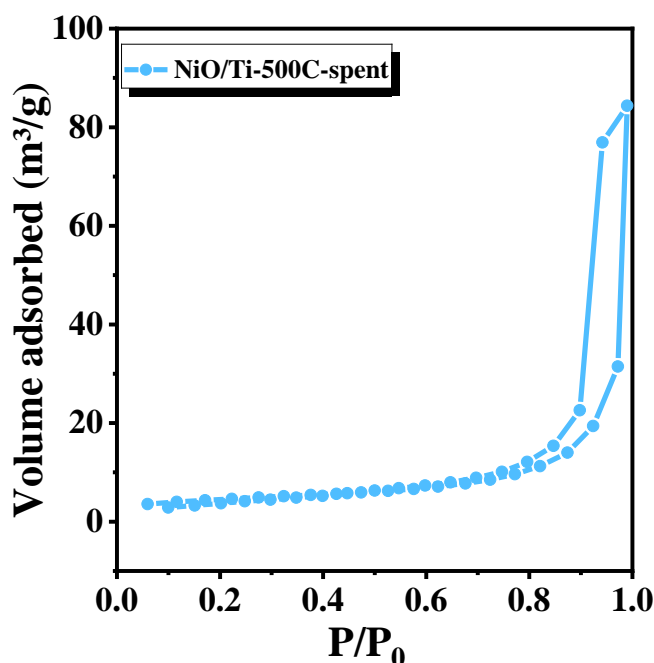

Figure S1. N<sub>2</sub> adsorption–desorption isotherms profile of the Ni/Ti-500R catalysts after 20h stability test.

The specific surface area, pore volume, and pore diameter are  $19.60 \text{ m}^3/\text{g}$ ,  $0.13 \text{ cm}^3/\text{g}$  and  $12.48 \text{ nm}$ , respectively.

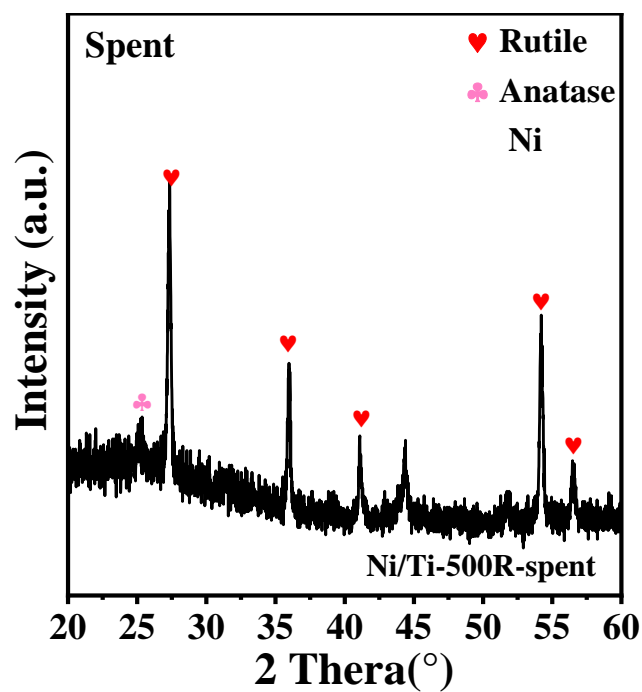

**Figure S2.** XRD pattern of the Ni/Ti-500R catalysts after 20 h stability test.

The particle size of  $\text{Ni}^0$  for Ni/Ti-500R catalysts after 20 h stability test is to be  $21.2 \pm 0.5 \text{ nm}$ . Compared with the reduced  $\text{Ni}^0$  particle size of Ni/Ti-500R, the particle size increases after high temperature reaction.
